# Supplementary material
Source: publisher figshare collection journal article supplement (https://acs.figshare.com/ndownloader/files/15112196)
Supplement: Supplementary file 1 [file 15112196]

# High Defect Nanoscale ZnO Films with Polar Facets for Enhanced Photocatalytic Performance

Premrudee Promdet<sup>a</sup>, Raul Quesada-Cabrera<sup>a</sup>, Sanjayan Sathasivam<sup>a</sup>, Jianwei Li<sup>a</sup>, Arreerat Jiamprasertboon<sup>a,b</sup>, Jian Guo<sup>a</sup>, Alaric Taylor<sup>c</sup>, Claire J. Carmalt<sup>a</sup> and Ivan P. Parkin<sup>a\*</sup>

<sup>a</sup> Materials Chemistry Centre, Department of Chemistry, University College London, 20 Gordon Street, London WC1H 0AJ, UK

Fax: (+44) 20-7679-7463

E-mail: [i.p.parkin@ucl.ac.uk](mailto:i.p.parkin@ucl.ac.uk)

<sup>b</sup> School of Chemistry, Institute of Science, Suranaree University of Technology, 111 University Avenue, Muang, Nakhon Ratchasima, 30000, Thailand

<sup>c</sup> Department of Electronic & Electrical Engineering, University College London, Torrington Place, London WC1E 7JE, UK

## Supporting Information

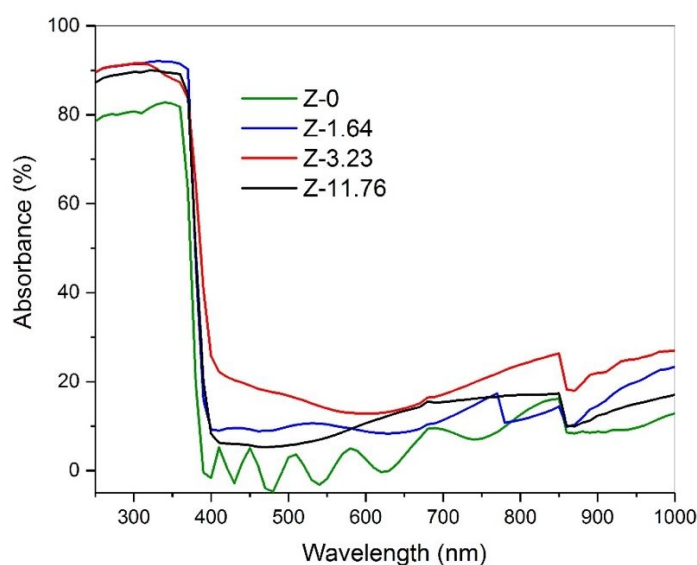

**Fig. S1.** Diffuse reflection absorbance of ZnO thin films prepared with different mixtures of methanol and acetic acid with additional volumes of acetic acid into the precursor mixtures being 0 mL (0 %vol, Z-0); 1 mL (1.64 %vol, Z-1.64); 2 mL (3.23 %vol, Z-3.23); and 8 mL (11.76 %vol, Z-11.76).

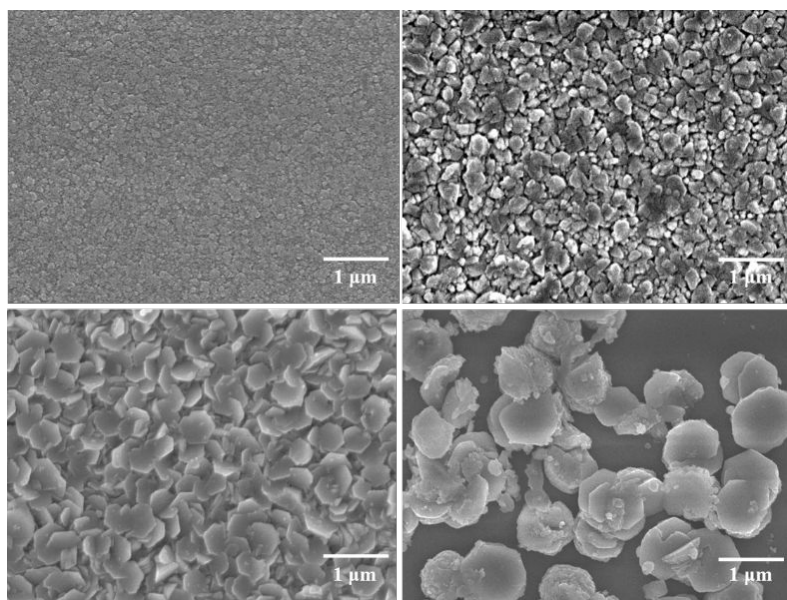

**Fig. S2.** Scanning electron microscopy (SEM) images showing the impact of annealing on the microstructure of the ZnO films with the additional volumes of acetic acid being : (a) 0 mL (0 %vol); (b) 1 mL (1.64 %vol); (c) 2 mL (3.23 %vol); and (d) 8 mL (11.76 %vol).

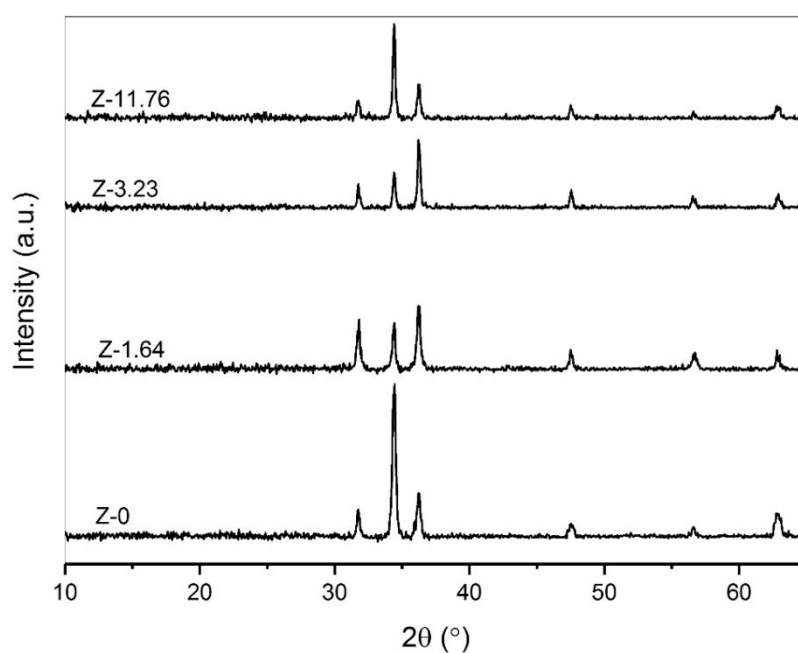

**Fig. S3.** (a) X-ray diffraction analysis of annealed ZnO films prepared with different mixtures of methanol and acetic acid. The additional volumes of acetic acid into the precursor mixtures were (a) 0 mL (0 %vol), Z-0; (b) 1 mL (1.64 %vol), Z-1.64; (c) 2 mL (3.23 %vol), Z-3.23; and (d) 8 mL (11.76 %vol), Z-11.76.
